# Supplementary material for: The Epidemiology of African Swine Fever in “Nonendemic” Regions of Zambia (1989–2015): Implications for Disease Prevention and Control
Source: MDPI journal article supplement (doi:10.3390/v9090236), 2017-08-23
Supplement: s1 [file s1]

**Table S1.** Summary of African swine fever viruses detected in Zambia used in this study\*

| Virus Name | District/area | Year | Host | <i>p72</i> GenBank<br>accession no.<br>[Reference] | <i>p72</i><br>Genotype | <i>p54</i> GenBank<br>accession no.<br>[Reference] | <i>p54</i><br>Genotype | <i>p30</i> GenBank<br>accession no.<br>[Reference] | CVR                      |
|------------|---------------|------|------|----------------------------------------------------|------------------------|----------------------------------------------------|------------------------|----------------------------------------------------|--------------------------|
| ZAM 2001/2 | Kafue         | 2001 | Pig  | AY494555 [22]                                      | I                      | KF015915<br>(Unpublished)                          | If                     | JQ764958<br>(Unpublished)                          | MF322715<br>(This study) |
| ZAM 2001/5 | Monze         | 2001 | Pig  | AY494558 [22]                                      | I                      | KF015917<br>(Unpublished)                          | If                     | JQ764961<br>(Unpublished)                          | Not done                 |
| ZAM 2001/1 | Lusaka        | 2001 | Pig  | AY494554 [22]                                      | I                      | Not done                                           | Not done               | JQ764957<br>(Unpublished)                          | MF322716<br>(This study) |
| ZAM 2001/3 | Mazabuka      | 2001 | Pig  | AY494556 [22]                                      | I                      | KF015916<br>(Unpublished)                          | If                     | JQ764959<br>(Unpublished)                          | Not done                 |
| ZAM 2002/1 | Lusaka        | 2002 | Pig  | AY494559 [22]                                      | I                      | KF015943<br>(Unpublished)                          | If                     | JQ764962<br>(Unpublished)                          | MF322711<br>(This study) |
| ZAM 2002/2 | Lusaka        | 2002 | Pig  | JX403680<br>(Unpublished)                          | I                      | KF736426<br>(Unpublished)                          | If                     | JQ764963<br>(Unpublished)                          | MF322710<br>(This study) |
| ZAM 2002/3 | Lusaka        | 2002 | Pig  | JX403681<br>(Unpublished)                          | I                      | Not done                                           | Not done               | Not done                                           | Not done                 |
| ZAM 2001/4 | Namwala       | 2001 | Pig  | AY494557 [22]                                      | I                      | KF736413<br>(Unpublished)                          | If                     | JQ764960<br>(Unpublished)                          | MF322714<br>(This study) |
| ZAM 2001/6 | Lusaka        | 2001 | Pig  | Not done                                           | Not done               | KF015918<br>(Unpublished)                          | If                     | JX524222<br>(Unpublished)                          | MF322713<br>(This study) |
| LIV 13/33  | Livingstone   | 1983 | Tick | AY494560 [22]                                      | I                      | KF015898<br>(Unpublished)                          | VIIIb                  | Not done                                           | MF359237<br>(This study) |

Table S1 continued

|                |             |      |                   |               |   |                           |    |                           |                          |
|----------------|-------------|------|-------------------|---------------|---|---------------------------|----|---------------------------|--------------------------|
| LIV 9/31       | Livingstone | 1983 | Tick <sup>s</sup> | AY351538 [22] | I | KF015928<br>(Unpublished) | Ie | JQ764966<br>(Unpublished) | MF322724<br>(This study) |
| LIV 12/17      | Livingstone | 1983 | Tick              | AY351524 [22] | I | KF015929<br>(Unpublished) | Ie | JQ764967<br>(Unpublished) | MF322723<br>(This study) |
| LIV 5/4        | Livingstone | 1983 | Tick <sup>s</sup> | AY351537 [22] | I | KF015930<br>(Unpublished) | Ie | Not done                  | MF322722<br>(This study) |
| LIV 5/40       | Livingstone | 1982 | Tick <sup>s</sup> | AY351536 [22] | I | KF015931<br>(Unpublished) | Ie | KC867518<br>(Unpublished) | MF322721<br>(This study) |
| LIV 9/35       | Livingstone | 1983 | Tick <sup>s</sup> | AY351539 [22] | I | KF736415<br>(Unpublished) | Ie | JQ764965<br>(Unpublished) | Not done                 |
| LIV 10/11      | Livingstone | 1983 | Tick <sup>s</sup> | AY351535 [22] | I | KF015932<br>(Unpublished) | Ie | KC867519<br>(Unpublished) | MF322720<br>(This study) |
| ZAM/15/Lusaka  | Lusaka      | 2015 | Pig               | LC088171 [39] | I | LC088174 [39]             | Ie | LC213616<br>(This study)  | LC174776<br>[16]         |
| ZAM/13/Lusaka  | Lusaka      | 2013 | Pig               | LC174754 [16] | I | LC174764 [16]             | Id | LC213614<br>(This study)  | LC174770<br>[16]         |
| ZAM/15/Kitwe   | Kitwe       | 2015 | Pig               | LC088172 [39] | I | LC088175 [39]             | Id | LC213617<br>(This study)  | LC174775<br>[16]         |
| ZAM/15/Solwezi | Solwezi     | 2015 | Pig               | LC088173 [39] | I | LC088176 [39]             | Id | LC213618<br>(This study)  | LC174774<br>[16]         |
| ZAM/13/Choma   | Choma       | 2013 | Pig               | LC174756 [16] | I | LC174759 [16]             | Id | LC213610<br>(This study)  | LC174773<br>[16]         |
| ZAM/13/Chongwe | Chongwe     | 2013 | Pig               | LC174757 [16] | I | LC174758 [16]             | Id | LC213609<br>(This study)  | LC174772<br>[16]         |

Table S1 continued

|                       |            |      |     |                           |      |                           |             |                           |                          |
|-----------------------|------------|------|-----|---------------------------|------|---------------------------|-------------|---------------------------|--------------------------|
| ZAM/13/Kazungula<br>a | Kazungula  | 2013 | Pig | LC174755 [16]             | I    | LC174763 [16]             | Id          | LC213613<br>(This study)  | LC174771<br>[16]         |
| ZAM/14/Chipata        | Chipata    | 2014 | Pig | LC174751 [16]             | II   | LC174760 [16]             | IIb         | LC213611<br>(This study)  | LC174766<br>[16]         |
| LUS 93/1              | Lusaka     | 1993 | Pig | AY351563 [22]             | II   | EU874377<br>(Unpublished) | IIa         | EU874275<br>(Unpublished) | MF322719<br>(This study) |
| ZAM/13/Mbala          | Mbala 2013 | 2013 | Pig | LC174750 [16]             | II   | LC174765 [16]             | IIa         | LC213615<br>(This study)  | LC174769<br>[16]         |
| PHW 88/1              | Chipata    | 1988 | Pig | AY351567 [22]             | VIII | EU874366                  |             | EU874257                  | DQ874361<br>[26]         |
| TMB 89/1              | Petauke    | 1989 | Pig | AY351557 [22]             | VIII | KF015937<br>(Unpublished) | VIIIb       | JQ764886<br>(Unpublished) | DQ874370<br>[26]         |
| TBM 89/1              | Petauke    | 1989 | Pig | AY351556 [22]             |      | EU874361<br>(Unpublished) | VIIIa       | EU874285<br>(Unpublished) | Not done                 |
| KLI 88/2              | Petauke    | 1988 | Pig | AY351553 [21]             | VIII | EU874347<br>(Unpublished) | VIIIa       | EU874258<br>(Unpublished) | DQ874384<br>[26]         |
| KAV 89/1              | Katete     | 1989 | Pig | AF449470 [21]             | VIII | KF015902<br>(Unpublished) | VIIIb       | JQ764890<br>(Unpublished) | DQ890169<br>[26]         |
| KAV 89/3              | Katete     | 1989 | Pig | JX467635<br>(Unpublished) | VIII | KF015900<br>(Unpublished) | VIIIb       | KC867508<br>(Unpublished) | MF359235<br>(This study) |
| JON 89/13             | Petauke    | 1989 | Pig | AF449469 [21]             | VIII | KF015901<br>(Unpublished) | VIIIa       | JQ764889<br>(Unpublished) | AY538728                 |
| KAL 88/1              | Chipata    | 1988 | Pig | AF449468 [21]             | VIII | KF736412<br>(Unpublished) | VIIIb       | Not done                  | AY538732                 |
| GUL 88/1              | Katete     | 1988 | Pig | AY351521 [22]             | VIII | Not done                  | Not<br>done | KC867514<br>(Unpublished) | DQ874385<br>[26]         |
| CHM 88/1              | Petauke    | 1988 | Pig | AY351520 [22]             | VIII | KF015925<br>(Unpublished) | VIIIb       | JQ764884<br>(Unpublished) | DQ874357<br>[26]         |
| CHJ 89/1              | Petauke    | 1989 | Pig | AY351519 [22]             | VIII | Not done                  | Not<br>done | Not done                  | DQ874363<br>[26]         |
| YEL 88/4              | Petauke    | 1988 | Pig | AY351558 [22]             | VIII | KF015938<br>(Unpublished) | VIIIb       | JQ764887<br>(Unpublished) | DQ874362<br>[26]         |
| KANA 89/1             | Katete     | 1989 | Pig | AY351523 [22]             | VIII | KF736422<br>(Unpublished) | VIIIb       | KF736440<br>(Unpublished) | DQ874365<br>[26]         |

Table S1 continued

|                |                  |      |      |               |      |                        |          |                        |                       |
|----------------|------------------|------|------|---------------|------|------------------------|----------|------------------------|-----------------------|
| CHG 88/1       | Katete           | 1988 | Pig  | AY351552 [22] | VIII | Not done               | Not done | JQ764883 (Unpublished) | DQ874383 [26]         |
| CHK 89/2       | Chipata          | 1989 | Pig  | AY351526 [22] | VIII | KF015921 (Unpublished) | VIIIb    | JQ764882 (Unpublished) | DQ874379 [26]         |
| TEN 89/1       | Petauke          | 1989 | Pig  | AY351556 [22] | VIII | KF736424 (Unpublished) | VIIIb    | KF736442 (Unpublished) | MF322717 (This study) |
| NKZ 88/1       | Petauke          | 1988 | Pig  | AY351554 [22] | VIII | KF015934 (Unpublished) | VIIIb    | JQ764885 (Unpublished) | DQ874360 [26]         |
| MAN 89/2       | Katete           | 1989 | Pig  | AY351562 [22] | VIII | KF015940 (Unpublished) | VIIIb    | JQ764881 (Unpublished) | Not done              |
| ZAW 88/1       |                  |      |      | AY351559 [22] | VIII | KF015941 (Unpublished) | VIIIb    | JQ764891 (Unpublished) | DQ874378 [26]         |
| ZON 88/1       | Katete           | 1988 | Pig  | AY351560 [22] | VIII | KF015939 (Unpublished) | VIIIb    | JQ764888 (Unpublished) | DQ874388 [26]         |
| MPO 89/1       | Petauke          | 1989 | Pig  | AY351541 [22] | VIII | KF736418 (Unpublished) | VIIIb    | KC867520 (Unpublished) | DQ874368 [26]         |
| MPI 89/1       | Kabwe            | 1989 | Pig  | AY351540 [22] | VIII | Not done               | Not done | Not done               | MF359238 (This study) |
| KAB 6/2        | Livingstone      | 1983 | Tick | AY351522 [22] | XI   | EU874331 (Unpublished) | XI       | EU874289 (Unpublished) | MF359239 (This study) |
| MFUE 6/1       | Mfue (LNP) Park) | 1982 | Tick | AY351561 [22] | XII  | Not done               | Not done | KC867522 (Unpublished) | Not done              |
| SUM 14/11      | Sumbu NP         | 1983 | Tick | AY351542 [22] | XIII | EU874357 (Unpublished) | XIII     | EU874287 (Unpublished) | MF322712 (This study) |
| ZAM/13/Kalomo  | Kalomo           | 2013 | Pig  | LC174752 [16] | XIV  | LC174761 [16]          | XIV      | LC213612 (This study)  | LC174767 [14]         |
| NYA 1/2        | Kalomo           | 1986 | Tick | AY351555 [22] | XIV  | EU874330 (Unpublished) | XIV      | EU874302 (Unpublished) | MF322718 (This study) |
| ZAM/14/Kasempa | Kasempa          | 2014 | Pig  | LC174753 [16] | XIV  | LC174762 [16]          | XIV      | Not done               | LC174768 [16]         |

\*Unpublished sequences were sequenced at Onderstepoort Veterinary Research, Agricultural Research Council, [Onderstepoort](#), South Africa.
